# Supplementary material for: Natural variation of DROT1 confers drought adaptation in upland rice
Source: PubMed Central journal article supplement (PMC9308802; doi:10.1038/s41467-022-31844-w), 2022-07-23
Supplement: 41467_2022_31844_MOESM3_ESM.pdf [file 41467_2022_31844_MOESM3_ESM.pdf]

## **Description of Additional Supplementary Files**

File Name: Supplementary Data 1

Description: Information of rice accessions and phenotypic data used in GWAS.

File Name: Supplementary Data 2

Description: List of QTLs and SNPs associated with drought resistance index and leaf rolling index by GWAS.

File Name: Supplementary Data 3

Description: Phenotypic data of seedlines of introgression lines under 15% PEG treatment.

File Name: Supplementary Data 4

Description: SNPs between IL349 and Yuefu located in the predicted gene regions of the qDR10b.

File Name: Supplementary Data 5

Description: RPKM of the 25 genes in the candidate region between upland rice and lowland rice.

File Name: Supplementary Data 6

Description: Information of 743 rice accessions used for haplotype and phylogenetic analysis.

File Name: Supplementary Data 7

Description: Primers used in this study.
